# Supplementary material
Source: publisher figshare collection journal article supplement (https://acs.figshare.com/ndownloader/files/5733903)
Supplement: Supplementary file 1 [file 5733903]

  
data_ejc21t 
  
_audit_creation_method            SHELXL-97 
_chemical_name_systematic 
; 
 ? 
; 
_chemical_name_common             ? 
_chemical_melting_point           ? 
_chemical_formula_moiety          ? 
_chemical_formula_sum 
 'C10 H10 B F3 O2' 
_chemical_formula_weight          229.99 
  
loop_ 
 _atom_type_symbol 
 _atom_type_description 
 _atom_type_scat_dispersion_real 
 _atom_type_scat_dispersion_imag 
 _atom_type_scat_source 
 'C'  'C'   0.0033   0.0016 
 'International Tables Vol C Tables 4.2.6.8 and 6.1.1.4' 
 'H'  'H'   0.0000   0.0000 
 'International Tables Vol C Tables 4.2.6.8 and 6.1.1.4' 
 'B'  'B'   0.0013   0.0007 
 'International Tables Vol C Tables 4.2.6.8 and 6.1.1.4' 
 'O'  'O'   0.0106   0.0060 
 'International Tables Vol C Tables 4.2.6.8 and 6.1.1.4' 
 'F'  'F'   0.0171   0.0103 
 'International Tables Vol C Tables 4.2.6.8 and 6.1.1.4' 
  
_symmetry_cell_setting            Monoclinic 
_symmetry_space_group_name_H-M    P2(1)/n 
  
loop_ 
 _symmetry_equiv_pos_as_xyz 
 'x, y, z' 
 '-x+1/2, y+1/2, -z+1/2' 
 '-x, -y, -z' 
 'x-1/2, -y-1/2, z-1/2' 
  
_cell_length_a                    9.9804(16) 
_cell_length_b                    10.1025(16) 
_cell_length_c                    10.7724(18) 
_cell_angle_alpha                 90.00 
_cell_angle_beta                  107.403(3) 
_cell_angle_gamma                 90.00 
_cell_volume                      1036.4(3) 
_cell_formula_units_Z             4 
_cell_measurement_temperature     193(2) 
_cell_measurement_reflns_used     ? 
_cell_measurement_theta_min       ? 
_cell_measurement_theta_max       ? 
  
_exptl_crystal_description        block 
_exptl_crystal_colour             Colorless 
_exptl_crystal_size_max           0.24 
_exptl_crystal_size_mid           0.20 
_exptl_crystal_size_min           0.20 
_exptl_crystal_density_meas       ? 
_exptl_crystal_density_diffrn     1.474 
_exptl_crystal_density_method     'not measured' 
_exptl_crystal_F_000              472 
_exptl_absorpt_coefficient_mu     0.134 
_exptl_absorpt_correction_type    none 
_exptl_absorpt_correction_T_min   ? 
_exptl_absorpt_correction_T_max   ? 
_exptl_absorpt_process_details    ? 
  
_exptl_special_details 
; 
Data was collected using a BRUKER SMART CCD (charge coupled device) based 
diffractometer equipped with an LT-2 low-temperature apparatus operating at 
193 K.  A suitable crystal was chosen and mounted on a glass fiber using grease. 
Data were measured using omega scans of 0.3\% per frame for 30 s , such 
that a hemisphere was collected. A total of 1271 frames were collected with a 
final resolution of 0.75 \%A.  The first 50 frames  were recollected at the end 
of data collection to monitor for decay.  Cell parameters were retrieved using 
SMART software and refined using SAINT on all observed reflections.  Data 
reduction was performed using the SAINT software which corrects for Lp and 
decay. The structures are solved by the direct method using the SHELX-90 
program and refined by least squares method on F2 SHELXL-93, incorporated in 
SHELXTL V5.1. 
  
Carbon-bound H atoms were placed in idealized positions and refined as a riding 
model. 
  
; 
  
_diffrn_ambient_temperature       193(2) 
_diffrn_radiation_wavelength      0.71073 
_diffrn_radiation_type            MoK\a 
_diffrn_radiation_source          'fine-focus sealed tube' 
_diffrn_radiation_monochromator   graphite 
_diffrn_measurement_device_type   ? 
_diffrn_measurement_method        '\w, 0.3 deg' 
_diffrn_detector_area_resol_mean  ? 
_diffrn_standards_number          0 
_diffrn_standards_interval_count  0 
_diffrn_standards_interval_time   ? 
_diffrn_standards_decay_%         <1 
_diffrn_reflns_number             5336 
_diffrn_reflns_av_R_equivalents   0.0467 
_diffrn_reflns_av_sigmaI/netI     0.0363 
_diffrn_reflns_limit_h_min        -13 
_diffrn_reflns_limit_h_max        13 
_diffrn_reflns_limit_k_min        -12 
_diffrn_reflns_limit_k_max        13 
_diffrn_reflns_limit_l_min        -10 
_diffrn_reflns_limit_l_max        14 
_diffrn_reflns_theta_min          2.44 
_diffrn_reflns_theta_max          28.37 
_reflns_number_total              2523 
_reflns_number_gt                 2158 
_reflns_threshold_expression      >2sigma(I) 
  
_computing_data_collection        'ASTRO (BRUKER, V5.007, 1997)' 
_computing_cell_refinement        'SMART (BRUKER, V5.054, 1998)' 
_computing_data_reduction         'SAINT (BRUKER, V6.01, 1999)' 
_computing_structure_solution     'SHELXS-97 (Sheldrick, 1990)' 
_computing_structure_refinement   'SHELXL-97 (Sheldrick, 1997)' 
_computing_molecular_graphics     'SHELXTL (BRUKER, 1998, V5.1)' 
_computing_publication_material   'XCIF (Sheldrick and BRUKER, 1997, V5.1)' 
  
_refine_special_details 
; 
 Refinement of F^2^ against ALL reflections.  The weighted R-factor wR and 
 goodness of fit S are based on F^2^, conventional R-factors R are based 
 on F, with F set to zero for negative F^2^. The threshold expression of 
 F^2^ > 2sigma(F^2^) is used only for calculating R-factors(gt) etc. and is 
 not relevant to the choice of reflections for refinement.  R-factors based 
 on F^2^ are statistically about twice as large as those based on F, and R- 
 factors based on ALL data will be even larger. 
; 
  
_refine_ls_structure_factor_coef  Fsqd 
_refine_ls_matrix_type            full 
_refine_ls_weighting_scheme       calc 
_refine_ls_weighting_details 
 'calc w=1/[\s^2^(Fo^2^)+(0.0836P)^2^+0.2021P] where P=(Fo^2^+2Fc^2^)/3' 
_atom_sites_solution_primary      direct 
_atom_sites_solution_secondary    difmap 
_atom_sites_solution_hydrogens    geom 
_refine_ls_hydrogen_treatment     mixed 
_refine_ls_extinction_method      none 
_refine_ls_extinction_coef        ? 
_refine_ls_number_reflns          2523 
_refine_ls_number_parameters      146 
_refine_ls_number_restraints      0 
_refine_ls_R_factor_all           0.0531 
_refine_ls_R_factor_gt            0.0473 
_refine_ls_wR_factor_ref          0.1420 
_refine_ls_wR_factor_gt           0.1361 
_refine_ls_goodness_of_fit_ref    1.065 
_refine_ls_restrained_S_all       1.065 
_refine_ls_shift/su_max           0.001 
_refine_ls_shift/su_mean          0.000 
  
loop_ 
 _atom_site_label 
 _atom_site_type_symbol 
 _atom_site_fract_x 
 _atom_site_fract_y 
 _atom_site_fract_z 
 _atom_site_U_iso_or_equiv 
 _atom_site_adp_type 
 _atom_site_occupancy 
 _atom_site_symmetry_multiplicity 
 _atom_site_calc_flag 
 _atom_site_refinement_flags 
 _atom_site_disorder_assembly 
 _atom_site_disorder_group 
B1 B 0.30981(16) 0.56264(16) 0.74911(15) 0.0349(3) Uani 1 1 d . . . 
O1 O 0.17306(10) 0.47838(9) 0.71215(8) 0.0323(2) Uani 1 1 d . . . 
O2 O -0.00261(9) 0.36445(10) 0.74079(9) 0.0341(2) Uani 1 1 d . . . 
F1 F 0.41313(10) 0.49369(13) 0.83466(11) 0.0639(3) Uani 1 1 d . . . 
F2 F 0.28025(12) 0.67563(11) 0.80258(13) 0.0656(4) Uani 1 1 d . . . 
F3 F 0.33707(11) 0.58218(12) 0.63501(9) 0.0592(3) Uani 1 1 d . . . 
C1 C 0.11487(13) 0.42627(12) 0.78860(12) 0.0297(3) Uani 1 1 d . . . 
C2 C 0.16936(14) 0.43004(14) 0.92922(12) 0.0332(3) Uani 1 1 d . . . 
H2 H 0.2512 0.4804 0.9693 0.040 Uiso 1 1 calc R . . 
C3 C 0.10639(13) 0.36397(13) 1.00300(12) 0.0322(3) Uani 1 1 d . . . 
H3 H 0.0228 0.3178 0.9590 0.039 Uiso 1 1 calc R . . 
C4 C 0.15277(13) 0.35536(13) 1.14433(12) 0.0311(3) Uani 1 1 d . . . 
C5 C 0.07506(15) 0.27799(15) 1.20509(14) 0.0382(3) Uani 1 1 d . . . 
H5 H -0.0061 0.2328 1.1538 0.046 Uiso 1 1 calc R . . 
C6 C 0.11481(17) 0.26636(16) 1.33909(14) 0.0428(3) Uani 1 1 d . . . 
H6 H 0.0612 0.2132 1.3794 0.051 Uiso 1 1 calc R . . 
C7 C 0.23208(16) 0.33187(16) 1.41388(14) 0.0426(3) Uani 1 1 d . . . 
H7 H 0.2590 0.3246 1.5060 0.051 Uiso 1 1 calc R . . 
C8 C 0.31068(16) 0.40815(18) 1.35509(15) 0.0444(4) Uani 1 1 d . . . 
H8 H 0.3921 0.4526 1.4070 0.053 Uiso 1 1 calc R . . 
C9 C 0.27176(15) 0.42017(15) 1.22159(13) 0.0383(3) Uani 1 1 d . . . 
H9 H 0.3264 0.4729 1.1820 0.046 Uiso 1 1 calc R . . 
C10 C -0.05993(15) 0.35299(16) 0.60087(13) 0.0392(3) Uani 1 1 d . . . 
H10A H -0.0672 0.4412 0.5615 0.059 Uiso 1 1 calc R . . 
H10B H -0.1534 0.3126 0.5791 0.059 Uiso 1 1 calc R . . 
H10C H 0.0020 0.2975 0.5673 0.059 Uiso 1 1 calc R . . 
  
loop_ 
 _atom_site_aniso_label 
 _atom_site_aniso_U_11 
 _atom_site_aniso_U_22 
 _atom_site_aniso_U_33 
 _atom_site_aniso_U_23 
 _atom_site_aniso_U_13 
 _atom_site_aniso_U_12 
B1 0.0319(7) 0.0371(8) 0.0355(7) -0.0012(6) 0.0099(5) -0.0063(6) 
O1 0.0324(5) 0.0331(5) 0.0324(4) 0.0006(3) 0.0109(3) -0.0046(4) 
O2 0.0298(5) 0.0404(5) 0.0314(5) 0.0007(4) 0.0083(3) -0.0054(4) 
F1 0.0321(5) 0.0822(8) 0.0714(7) 0.0261(6) 0.0065(4) 0.0002(5) 
F2 0.0619(7) 0.0450(6) 0.0993(9) -0.0273(5) 0.0383(6) -0.0178(5) 
F3 0.0534(6) 0.0865(8) 0.0408(5) -0.0016(5) 0.0190(4) -0.0296(5) 
C1 0.0287(6) 0.0274(6) 0.0335(6) -0.0007(4) 0.0103(5) 0.0014(4) 
C2 0.0323(6) 0.0348(7) 0.0321(6) -0.0025(5) 0.0093(5) -0.0023(5) 
C3 0.0290(6) 0.0343(6) 0.0334(6) -0.0015(5) 0.0096(5) 0.0010(5) 
C4 0.0296(6) 0.0323(6) 0.0329(6) -0.0012(5) 0.0116(5) 0.0034(5) 
C5 0.0375(7) 0.0409(8) 0.0376(7) -0.0029(5) 0.0135(5) -0.0058(6) 
C6 0.0498(8) 0.0441(8) 0.0391(7) 0.0010(6) 0.0201(6) -0.0039(6) 
C7 0.0455(8) 0.0515(9) 0.0307(6) -0.0001(6) 0.0113(5) 0.0055(6) 
C8 0.0351(7) 0.0581(10) 0.0374(7) -0.0071(6) 0.0070(5) -0.0044(6) 
C9 0.0334(7) 0.0459(8) 0.0366(7) -0.0024(5) 0.0121(5) -0.0045(6) 
C10 0.0343(7) 0.0480(8) 0.0317(6) 0.0015(5) 0.0044(5) -0.0070(6) 
  
_geom_special_details 
; 
 All esds (except the esd in the dihedral angle between two l.s. planes) 
 are estimated using the full covariance matrix.  The cell esds are taken 
 into account individually in the estimation of esds in distances, angles 
 and torsion angles; correlations between esds in cell parameters are only 
 used when they are defined by crystal symmetry.  An approximate (isotropic) 
 treatment of cell esds is used for estimating esds involving l.s. planes. 
; 
  
loop_ 
 _geom_bond_atom_site_label_1 
 _geom_bond_atom_site_label_2 
 _geom_bond_distance 
 _geom_bond_site_symmetry_2 
 _geom_bond_publ_flag 
B1 F2 1.3504(19) . ? 
B1 F3 1.3505(18) . ? 
B1 F1 1.3525(19) . ? 
B1 O1 1.5559(17) . ? 
O1 C1 1.2564(15) . ? 
O2 C1 1.2919(16) . ? 
O2 C10 1.4481(16) . ? 
C1 C2 1.4489(17) . ? 
C2 C3 1.3308(18) . ? 
C3 C4 1.4554(17) . ? 
C4 C9 1.3930(19) . ? 
C4 C5 1.3945(19) . ? 
C5 C6 1.383(2) . ? 
C6 C7 1.376(2) . ? 
C7 C8 1.381(2) . ? 
C8 C9 1.378(2) . ? 
  
loop_ 
 _geom_angle_atom_site_label_1 
 _geom_angle_atom_site_label_2 
 _geom_angle_atom_site_label_3 
 _geom_angle 
 _geom_angle_site_symmetry_1 
 _geom_angle_site_symmetry_3 
 _geom_angle_publ_flag 
F2 B1 F3 113.19(14) . . ? 
F2 B1 F1 111.34(13) . . ? 
F3 B1 F1 112.05(14) . . ? 
F2 B1 O1 106.55(12) . . ? 
F3 B1 O1 104.31(11) . . ? 
F1 B1 O1 108.92(12) . . ? 
C1 O1 B1 127.13(10) . . ? 
C1 O2 C10 118.85(10) . . ? 
O1 C1 O2 118.92(11) . . ? 
O1 C1 C2 124.87(12) . . ? 
O2 C1 C2 116.20(11) . . ? 
C3 C2 C1 120.97(12) . . ? 
C2 C3 C4 126.55(12) . . ? 
C9 C4 C5 118.52(12) . . ? 
C9 C4 C3 122.99(12) . . ? 
C5 C4 C3 118.49(12) . . ? 
C6 C5 C4 120.76(13) . . ? 
C7 C6 C5 119.91(14) . . ? 
C6 C7 C8 120.02(13) . . ? 
C9 C8 C7 120.40(14) . . ? 
C8 C9 C4 120.39(13) . . ? 
  
loop_ 
 _geom_torsion_atom_site_label_1 
 _geom_torsion_atom_site_label_2 
 _geom_torsion_atom_site_label_3 
 _geom_torsion_atom_site_label_4 
 _geom_torsion 
 _geom_torsion_site_symmetry_1 
 _geom_torsion_site_symmetry_2 
 _geom_torsion_site_symmetry_3 
 _geom_torsion_site_symmetry_4 
 _geom_torsion_publ_flag 
F2 B1 O1 C1 -66.88(17) . . . . ? 
F3 B1 O1 C1 173.13(12) . . . . ? 
F1 B1 O1 C1 53.33(18) . . . . ? 
B1 O1 C1 O2 176.71(12) . . . . ? 
B1 O1 C1 C2 -3.1(2) . . . . ? 
C10 O2 C1 O1 2.45(18) . . . . ? 
C10 O2 C1 C2 -177.75(11) . . . . ? 
O1 C1 C2 C3 -175.01(12) . . . . ? 
O2 C1 C2 C3 5.20(19) . . . . ? 
C1 C2 C3 C4 177.55(12) . . . . ? 
C2 C3 C4 C9 1.4(2) . . . . ? 
C2 C3 C4 C5 -178.19(13) . . . . ? 
C9 C4 C5 C6 0.3(2) . . . . ? 
C3 C4 C5 C6 179.89(13) . . . . ? 
C4 C5 C6 C7 0.2(2) . . . . ? 
C5 C6 C7 C8 -0.6(2) . . . . ? 
C6 C7 C8 C9 0.6(2) . . . . ? 
C7 C8 C9 C4 -0.1(2) . . . . ? 
C5 C4 C9 C8 -0.4(2) . . . . ? 
C3 C4 C9 C8 -179.91(13) . . . . ? 
  
loop_ 
 _geom_hbond_atom_site_label_D 
 _geom_hbond_atom_site_label_H 
 _geom_hbond_atom_site_label_A 
 _geom_hbond_distance_DH 
 _geom_hbond_distance_HA 
 _geom_hbond_distance_DA 
 _geom_hbond_angle_DHA 
 _geom_hbond_site_symmetry_A 
C2 H2 F1  0.95 2.48 2.9753(17) 112.7 . 
C2 H2 F2  0.95 2.74 3.1851(18) 109.4 . 
  
_diffrn_measured_fraction_theta_max    0.970 
_diffrn_reflns_theta_full              28.37 
_diffrn_measured_fraction_theta_full   0.970 
_refine_diff_density_max    0.397 
_refine_diff_density_min   -0.363 
_refine_diff_density_rms    0.103 
  
